# Supplementary material for: Convective organization and 3D structure of tropical cloud systems deduced from synergistic A-Train observations and machine learning
Source: Copernicus journal article supplement (doi:10.5194/acp-23-5867-2023), 2023-05-26
Supplement: Supplementary file 1 [file acp-23-5867-2023-supplement.pdf]

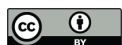

*Supplement of*

## **Convective organization and 3D structure of tropical cloud systems deduced from synergistic A-Train observations and machine learning**

**Claudia J. Stubenrauch et al.**

*Correspondence to:* Claudia J. Stubenrauch ([claudia.stubenrauch@lmd.ipsl.fr](mailto:claudia.stubenrauch@lmd.ipsl.fr))

The copyright of individual parts of the supplement might differ from the article licence.

Artificial Neural Network predictions and evaluation

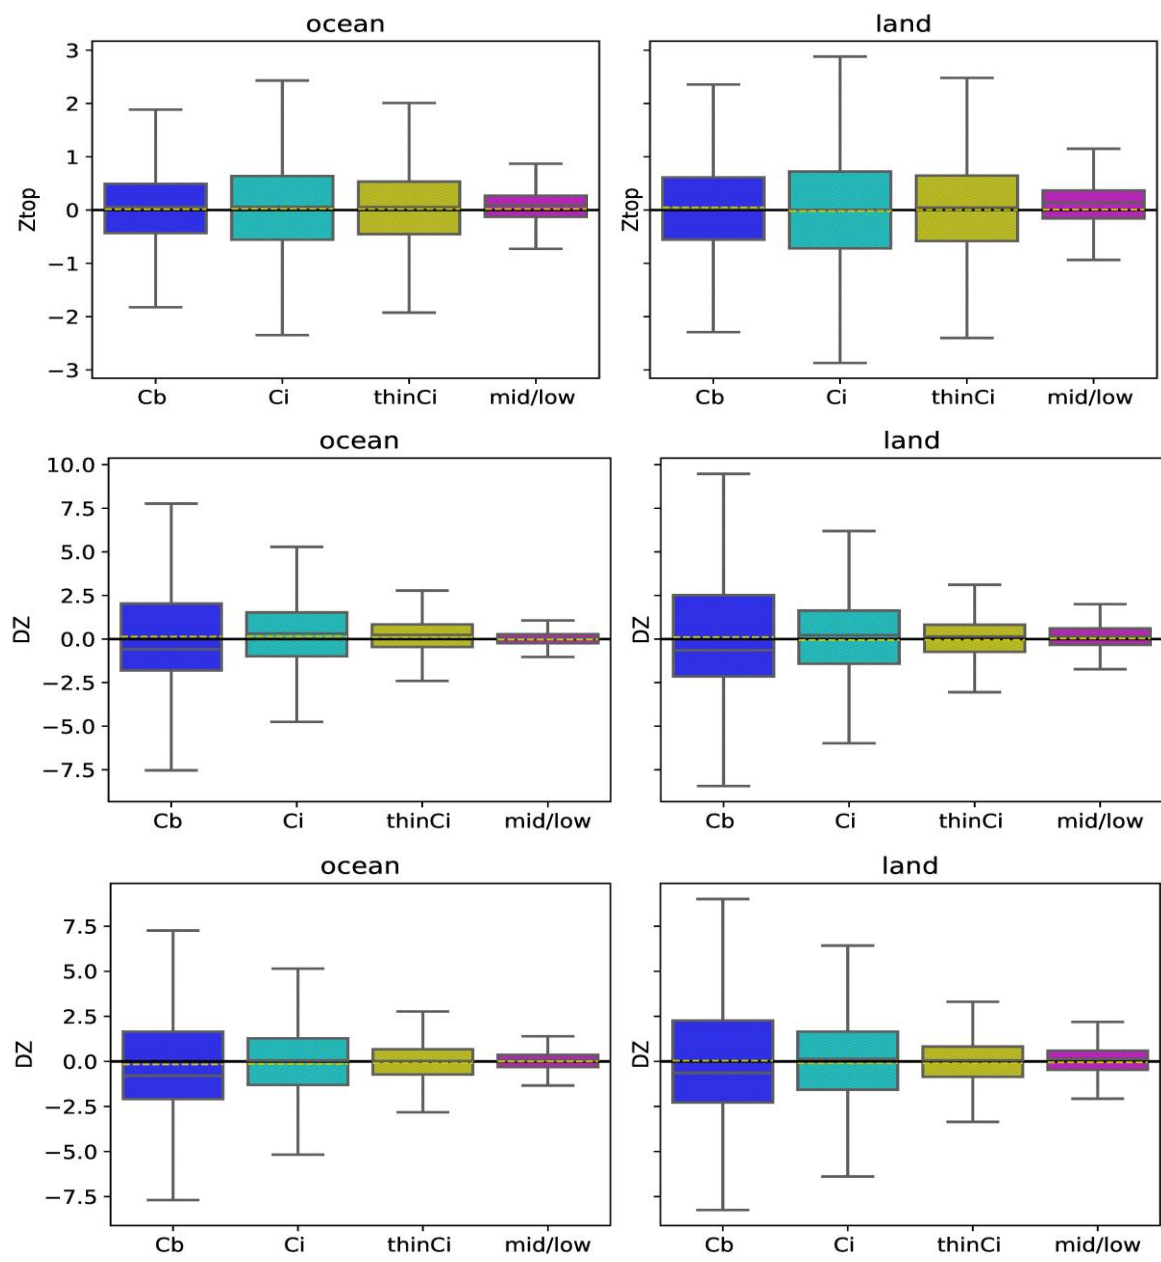

Figure S1: Box-and-whisker plots of  $Z_{top}(\text{predicted}) - Z_{top}(\text{observed})$  and  $DZ(\text{predicted}) - DZ(\text{observed})$  in km, for Cb, Ci, thin Ci, mid- and lowlevel clouds separately over ocean (left) and over land (right). The  $DZ$  results are shown for two developed models: The first model includes the predicted  $Z_{top}$  as input parameter (middle panels), the second does not (bottom panels). The boxes show the quartiles of the data while the whiskers extend to show the rest of the distribution.

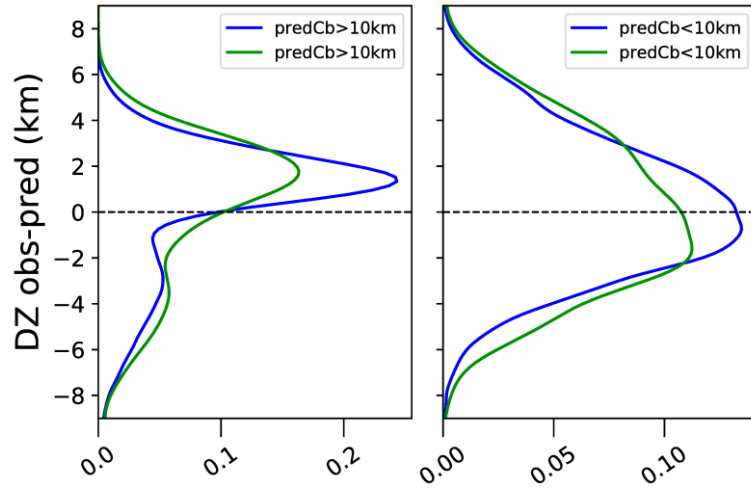

**Figure S2: Normalized distributions of  $DZ(\text{predicted}) - DZ(\text{observed})$ , for Cb over ocean and over land. Compared are Cbs for which  $DZ > 10$  km is predicted (left) and those for which  $DZ < 10$  km is predicted. The prediction models have been applied to 20% of the collocated data and are compared with the results derived from CloudSat-lidar 2B GEOPROF data.**

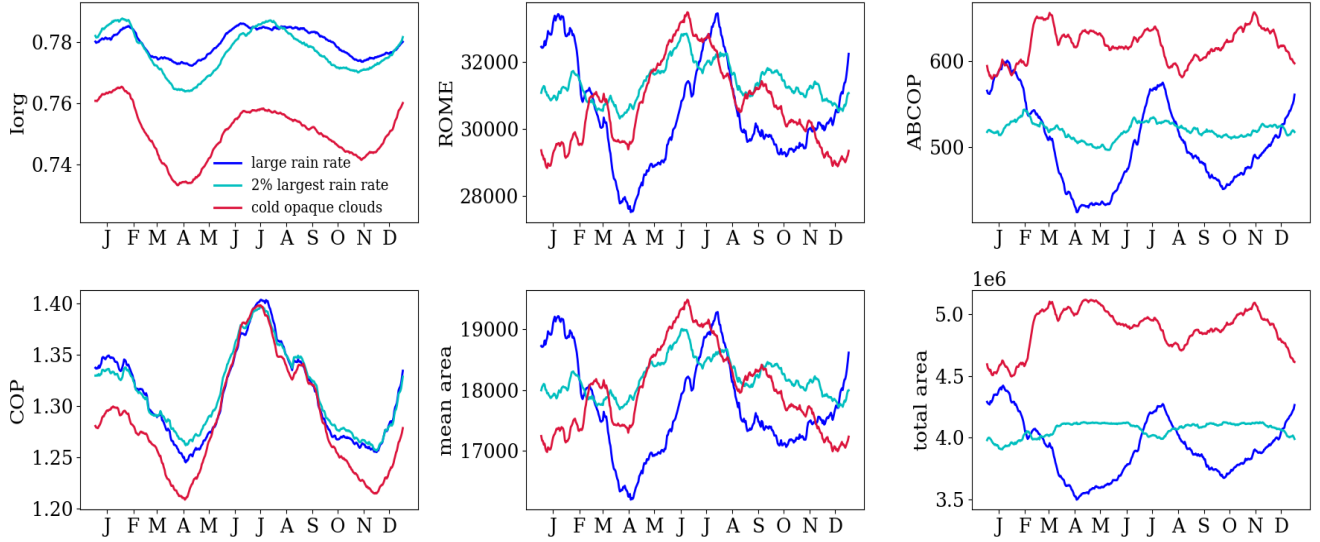

**Figure S3: Annual cycle of  $I_{\text{org}}$ , ROME, ABCOP, COP, mean area and total area estimated from convective areas defined by different variables. These areas are built from grid cells covered by at least 90% UT clouds, with rain rate indicator  $> 2$ ,  $T_{\text{clld}} < 230 \text{ K}$  &  $\epsilon_{\text{clld}} > 0.95$ , or using the 2% largest rain rate indicator. The latter leads to a constant total area of convection. Monthly statistics of UT clouds averaged over four observation times from 2008 to 2018.**

35

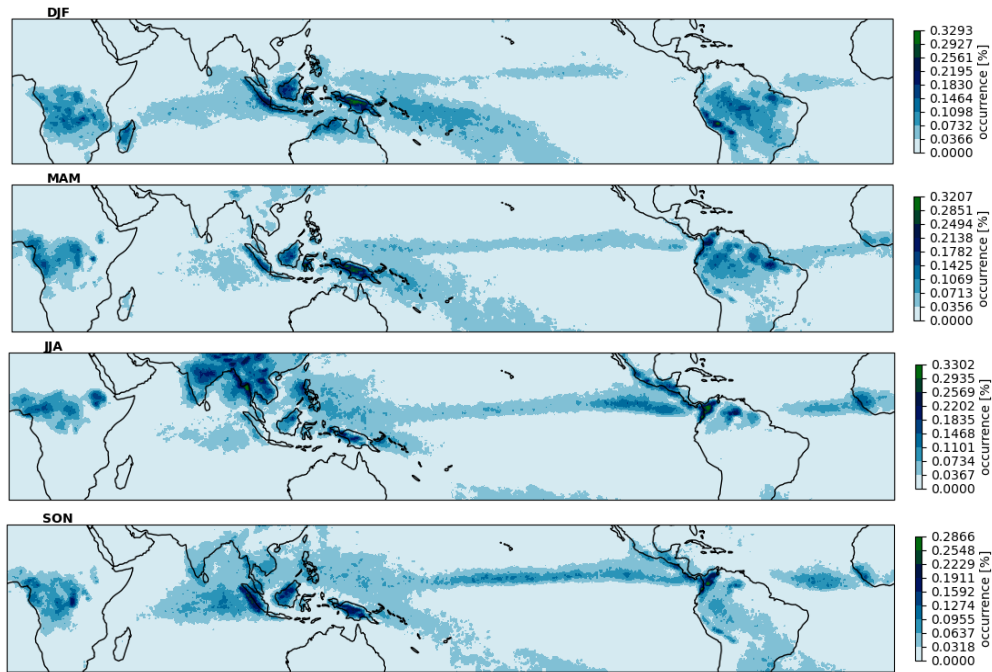

Figure S4: Geographical maps of intense precipitation (indicated by rain rate indicator > 2) occurrence, separately for the four seasons of boreal winter, spring, summer and autumn. Monthly statistics averaged over four observation times from 2008 to 2018.

40

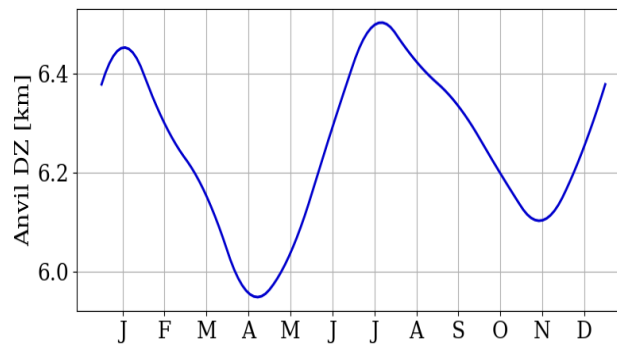

Figure S5: Annual cycle of anvil vertical extent. Monthly statistics averaged over four observation times from 2008 to 2018.

45

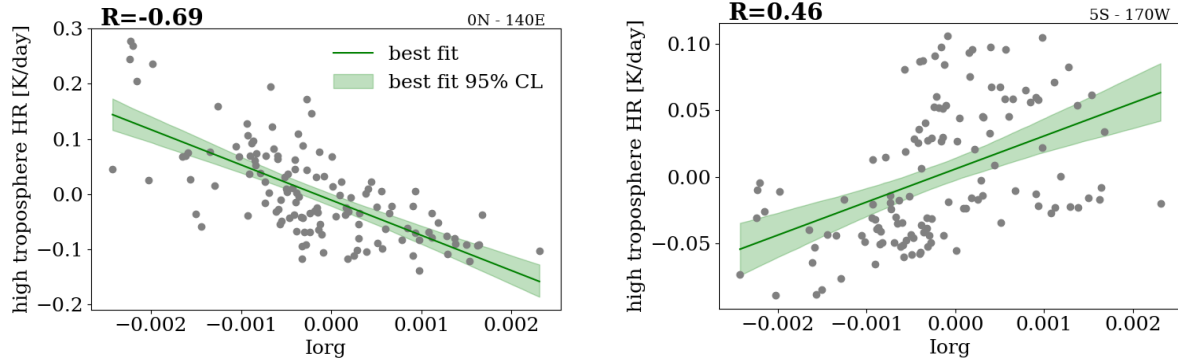

50 **Figure S6: Scatter distributions of the 12 month running mean UT radiative heating rate and  $I_{\text{org}}$  anomalies, the latter obtained by using intense precipitation as proxy to define convective areas, separately for two locations in the tropics: 0N-140E (Warm Pool, left) and 5S-170W (Central Pacific, right). Linear regression fits are also shown, with correlation coefficients. Monthly statistics of UT clouds averaged over four observation times from 2008 to 2018.**

55

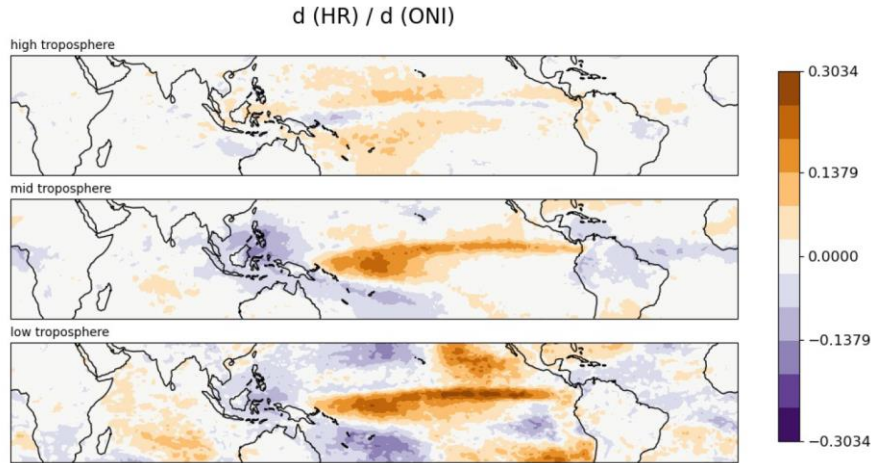

60 **Figure S7: Change in radiative heating rates with Oceanic Niño index (ONI). The troposphere is divided into three layers: upper troposphere (100-200 hPa), mid troposphere (200-600 hPa), and low troposphere (600-900 hPa). Monthly statistics from 2008 to 2018.**

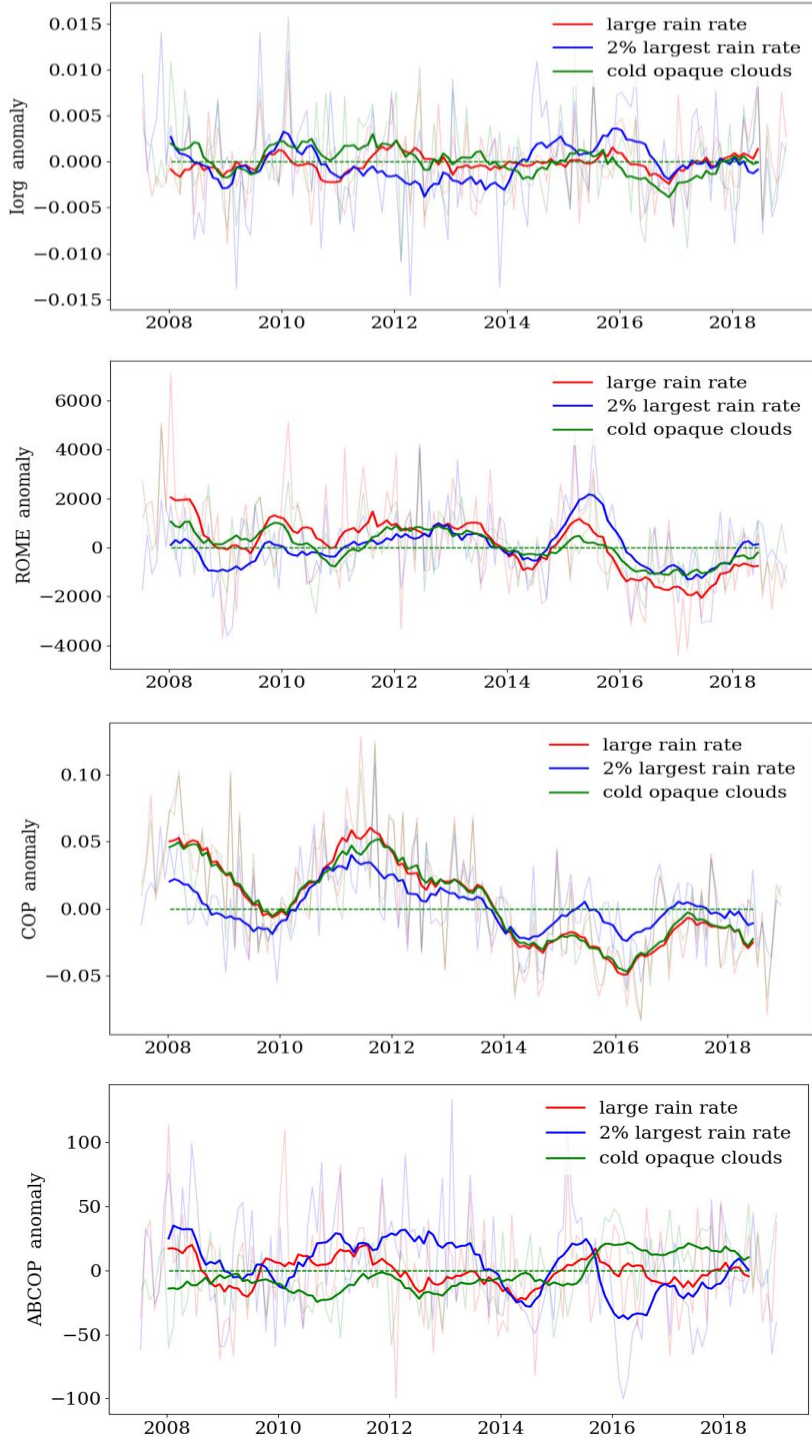

**Figure S8: Time series of deseasonalized monthly anomalies of  $I_{\text{org}}$ , ROME, COP and ABCOP, using different proxies to define the convective areas.**
